# Supplementary material for: Identification and Characterization of Cancer Stem-Like Cells in ALK-Positive Anaplastic Large Cell Lymphoma Using the SORE6 Reporter
Source: MDPI journal article supplement (doi:10.3390/cimb43020041), 2021-07-02
Supplement: s1 [file s1]

*Supplementary Materials*

## Identification and Characterization of Cancer Stem-like Cells in ALK-Positive Anaplastic Large Cell Lymphoma Using the SORE6 Reporter

Jing Li <sup>1,2¶</sup>, Moinul Haque <sup>1,3¶</sup>, Chuquan Shang <sup>1</sup>, Bardes Hassan <sup>1,4</sup>, Dongzhe Liu <sup>1,5,6</sup>, Will Chen <sup>1</sup> and Raymond Lai <sup>1,7</sup>

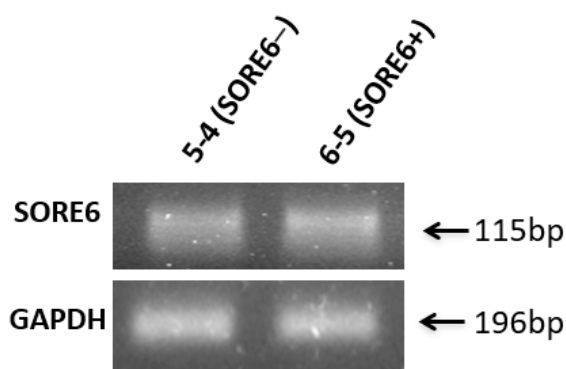

**Figure S1.** Confirmation of SORE6 reporter plasmid SupM2 SORE6 clone 5-4 (SORE6<sup>-</sup>) and 6-5 (SORE6<sup>+</sup>). PCR amplification was performed to identify presence of SORE region in SORE6<sup>-</sup> and SORE6<sup>+</sup> cells. GAPDH was used as endogenous control.

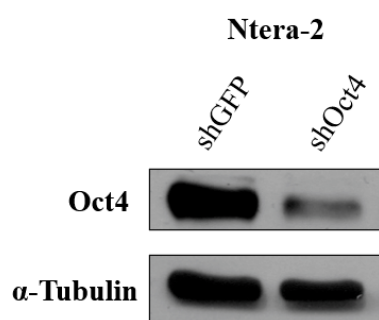

**Figure S2.** Knockdown of Oct4 in Ntera-2 cells using shRNA. The same Oct4 shRNA was used in all experiments in the main manuscript.

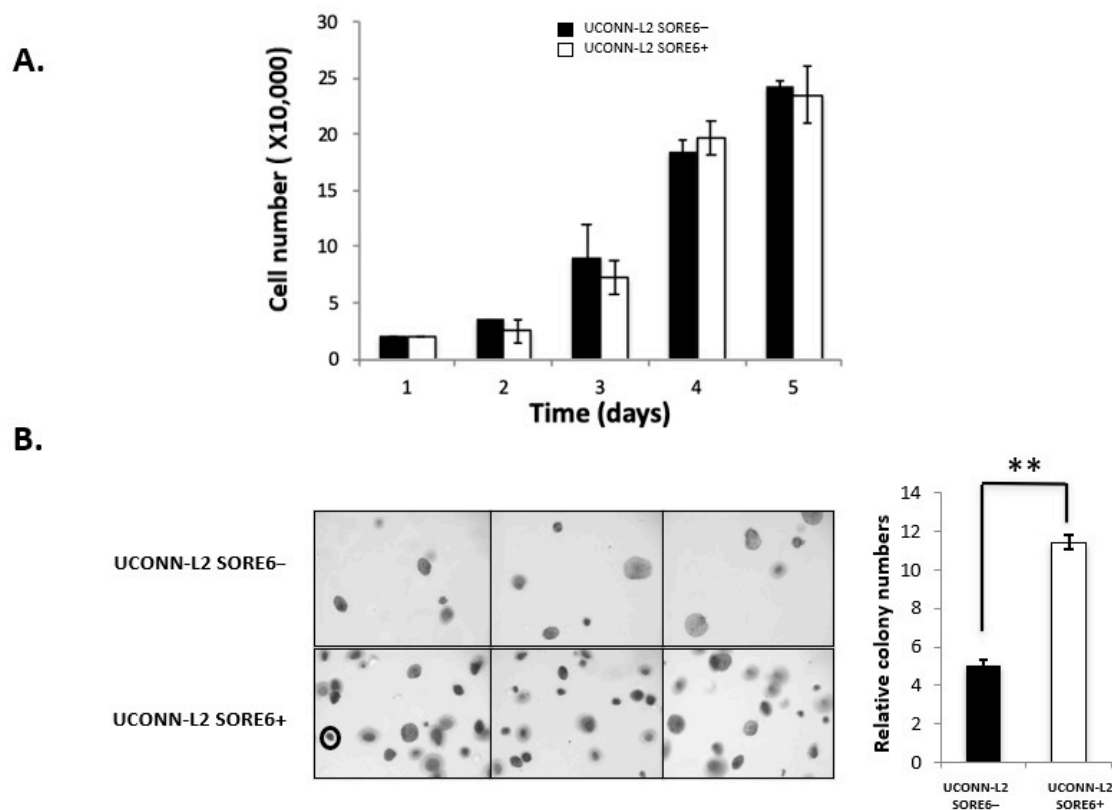

**Figure S3.** Cell growth and colony-formation ability of UCONN-L2 SORE6<sup>-</sup> and SORE6<sup>+</sup> clones. **(A)** Cell growth of UCONN-L2 SORE6<sup>-</sup> and SORE6<sup>+</sup> clones over the course of 5 days. **(B)** Soft-agar assay of UCONN-L2 SORE6<sup>-</sup> and SORE6<sup>+</sup> clones over the course of 10 days. The black circle on the lower left panel indicates the size cut-off for a colony.

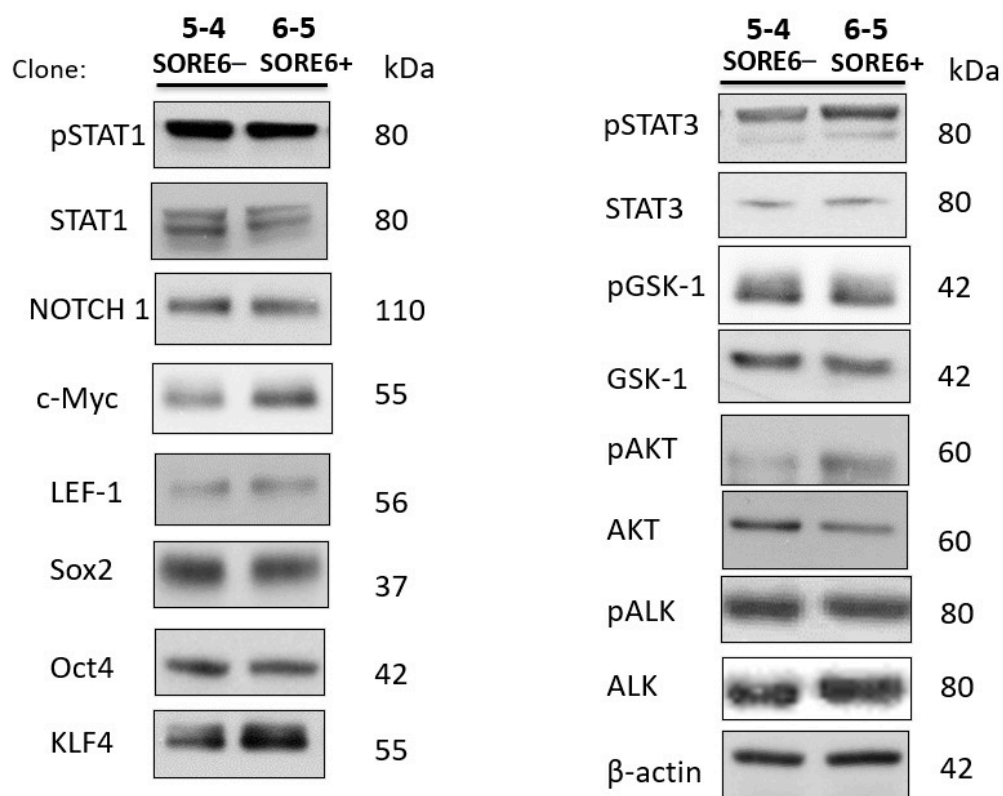

**Figure S4.** Analysis of total and phosphorylated proteins in 5-4 (SupM2 SORE6-) and 6-5 (SORE6+) clones. Western blotting of a panel of total and phosphorylated proteins was performed in SORE6- and SORE6+ clones.
